# Supplementary material for: TORPEdO: A phase III trial of intensity-modulated proton beam therapy versus intensity-modulated radiotherapy for multi-toxicity reduction in oropharyngeal cancer
Source: PubMed Central journal article supplement (PMC9702982; doi:10.1016/j.ctro.2022.11.010), 2022-11-21
Supplement: mmc2.pdf [file mmc2.pdf]

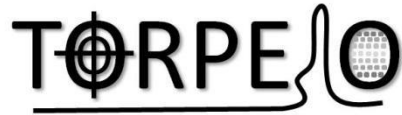

**A phase III trial of intensity-modulated proton beam therapy versus intensity-modulated radiotherapy for multi-toxicity reduction in oropharyngeal cancer.**

**RADIOTHERAPY TREATMENT PLANNING AND DELIVERY, AND QA GUIDELINES**

Version: 3.0

Dated: 9th Feb 2021

Chief Investigator: Dr David Thomson (The Christie NHS Foundation Trust)  
Sponsor: The Institute of Cancer Research  
Approval: Cancer Research UK: Clinical Research Committee (CRUK CRC)  
Funders: Cancer Research UK  
Additional Financial Support: The Taylor Family Foundation  
Coordinating Trials Unit: ICR Clinical Trials and Statistics Unit (ICR-CTSU)  
The Institute of Cancer Research

Main REC Reference Number: 19/NW/0700

Protocol Number: ICR-CTSU/2019/10067

CCR Number: CCR5134

ISRCTN: 16424014

CRUK Reference Number: CRUK/18/010

IRAS ID: 268843

The TORPEdO trial has been approved by Cancer Research UK's Clinical Research Committee (CRUK CRC).

The TORPEdO trial is part of the National Institute for Health Research Clinical Research Network Trial Portfolio

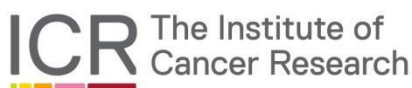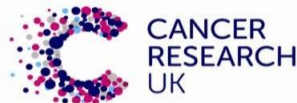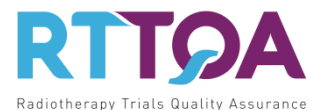

This is a controlled document which should be referred to in conjunction with the TORPEdO protocol and should not be copied, distributed or reproduced.

## **TRIAL ADMINISTRATION**

### **Scientific Coordination**

Dr David Thomson (Chief Investigator)  
The Christie NHS Foundation Trust  
Wilmslow Road  
Manchester  
M20 4BX

### **Translational Lead**

Prof Catharine West  
Professor of Radiation Biology, Translational Radiobiology Group  
Division of Cancer Sciences  
School of Medical Sciences, Faculty of Biology, Medicine and Health  
The University of Manchester, Manchester Academic Health Science Centre  
The Christie NHS Foundation Trust  
Wilmslow Road  
Manchester  
M20 4BX

### **Trial Coordination**

ICR-CTSU (a UKCRC registered CTU and an NCRI cancer clinical trials unit) is responsible for the central coordination of the trial on behalf of the Sponsor.

ICR Clinical Trials & Statistics Unit (ICR-CTSU)  
Division of Clinical Studies  
The Institute of Cancer Research  
Sir Richard Doll Building  
Cotswold Road  
Sutton, Surrey SM2 5NG

ICR-CTSU Scientific/Trial Methodology Lead: Emma Hall  
Tel: 020 8722 4013  
Email: [Emma.Hall@icr.ac.uk](mailto:Emma.Hall@icr.ac.uk)

ICR-CTSU Clinical Trials Programme Manager: Clare Cruickshank  
Tel: 020 8722 4058  
Email: [Clare.Cruickshank@icr.ac.uk](mailto:Clare.Cruickshank@icr.ac.uk)

ICR-CTSU Statistician: Abdullahi Omar  
Tel: 020 8722 4535  
Email: [Abdullahi.Omar@icr.ac.uk](mailto:Abdullahi.Omar@icr.ac.uk)

ICR-CTSU Trial Manager: Vicky Scott  
Tel: 020 8722 4157  
Email: [Vicky.Scott@icr.ac.uk](mailto:Vicky.Scott@icr.ac.uk)  
[TORPEdO-icrctsu@icr.ac.uk](mailto:TORPEdO-icrctsu@icr.ac.uk)

## Radiotherapy Quality Assurance Team Overview

### Primary Contact for General Queries

Dr James Price  
Senior Clinical Fellow  
Clinical QA Lead for TORPEdO  
The Christie NHS Foundation Trust  
Email: [James.Price@nhs.net](mailto:James.Price@nhs.net)

### Primary Contact for QA Queries

Julian Phillips, Justine Tyler, Helen Baines  
RTTQA Contacts  
Email: [TORPEdOqa.enh-tr@nhs.net](mailto:TORPEdOqa.enh-tr@nhs.net)

### Clinical Contacts

|                                                                                                                                                                                           |                                                                                                                                                                                      |
|-------------------------------------------------------------------------------------------------------------------------------------------------------------------------------------------|--------------------------------------------------------------------------------------------------------------------------------------------------------------------------------------|
| Dr Nachi Palaniappan<br>Consultant Clinical Oncologist<br>Velindre NHS Trust<br>Email: <a href="mailto:Nachi.Palaniappan@wales.nhs.uk">Nachi.Palaniappan@wales.nhs.uk</a>                 | Professor Chris Nutting<br>Consultant Clinical Oncologist<br>The Royal Marsden NHS Foundation Trust<br>Email: <a href="mailto:chris.nutting@rmh.nhs.uk">chris.nutting@rmh.nhs.uk</a> |
| Dr Robin Prestwich<br>Consultant Clinical Oncologist<br>Leeds Teaching Hospitals NHS Trust<br>Email: <a href="mailto:robin.prestwich@nhs.net">robin.prestwich@nhs.net</a>                 | Dr Bernie Foran<br>Consultant Clinical Oncologist<br>Sheffield Teaching Hospitals NHS Foundation Trust<br>Email: <a href="mailto:b.foran@nhs.net">b.foran@nhs.net</a>                |
| Dr Andrew McPartlin<br>Consultant Clinical Oncologist<br>The Christie NHS Foundation Trust<br>Email: <a href="mailto:Andrew.McPartlin@nhs.net">Andrew.McPartlin@nhs.net</a>               | Dr David Thomson<br>Consultant Clinical Oncologist<br>The Christie NHS Foundation Trust<br>Email: <a href="mailto:David.Thomson2@nhs.net">David.Thomson2@nhs.net</a>                 |
| Dr Anna Thompson<br>Consultant Clinical Oncologist<br>University College London Hospitals NHS Foundation Trust<br>Email: <a href="mailto:annathompson1@nhs.net">annathompson1@nhs.net</a> |                                                                                                                                                                                      |

### Physics Contacts

|                                                                                                                                                                |                                                                                                                                                                                           |
|----------------------------------------------------------------------------------------------------------------------------------------------------------------|-------------------------------------------------------------------------------------------------------------------------------------------------------------------------------------------|
| Dr Mat Lowe<br>Proton Beam Therapy Physicist<br>The Christie NHS Foundation Trust<br>Email: <a href="mailto:Matthew.Lowe11@nhs.net">Matthew.Lowe11@nhs.net</a> | Mr Callum Gillies<br>Proton Beam Therapy Physicist<br>University College London Hospitals NHS Foundation Trust<br>Email: <a href="mailto:callumgillies@nhs.net">callumgillies@nhs.net</a> |
|----------------------------------------------------------------------------------------------------------------------------------------------------------------|-------------------------------------------------------------------------------------------------------------------------------------------------------------------------------------------|

## TORPEdO Radiotherapy Treatment Planning and Delivery, and QA Guidelines

### National RTTQA Group

|                                                                                                                     |                                                                                                                    |
|---------------------------------------------------------------------------------------------------------------------|--------------------------------------------------------------------------------------------------------------------|
| Mrs Justine Tyler<br>RTTQA Physicist<br><a href="mailto:TORPEdOqa.enh-tr@nhs.net">TORPEdOqa.enh-tr@nhs.net</a>      | Ms Helen Baines<br>RTTQA Physicist<br><a href="mailto:TORPEdOqa.enh-tr@nhs.net">TORPEdOqa.enh-tr@nhs.net</a>       |
| Mr Julian Phillips<br>RTTQA Dosimetrist<br><a href="mailto:TORPEdOqa.enh-tr@nhs.net">TORPEdOqa.enh-tr@nhs.net</a>   |                                                                                                                    |
| Mrs Elizabeth Miles<br>RTTQA Co-ordinator<br><a href="mailto:TORPEdOqa.enh-tr@nhs.net">TORPEdOqa.enh-tr@nhs.net</a> | Dr Chloe Brooks<br>RTTQA Research Fellow<br><a href="mailto:TORPEdOqa.enh-tr@nhs.net">TORPEdOqa.enh-tr@nhs.net</a> |

## FOREWORD

This document describes the radiotherapy outlining, planning and QA processes for the TORPEdO trial. When used in conjunction with the main trial protocol it provides all the information necessary for entering patients into the trial. This document should not be used as a guide for the treatment of patients outside of the trial.

Every care has been taken in drafting these guidelines but corrections or amendments may be necessary. These will be circulated to investigators in the trial, but centres entering patients for the first time are advised to contact the ICR-CTSU (TORPEdO-icrctsu@icr.ac.uk) to ensure they have the most recent and approved version.

If you have any queries in regards to these guidelines please contact the RTTQA group by email on the following address: TORPEdOqa.enh-tr@nhs.net.

## DETAILS OF AMENDMENTS TO THE TORPEdO RT GUIDELINES

| DOCUMENT VERSION AND DATE | SUMMARY OF CHANGES                                                                                                                                                                                                                                                                                                                                                                                                                                                                                         |
|---------------------------|------------------------------------------------------------------------------------------------------------------------------------------------------------------------------------------------------------------------------------------------------------------------------------------------------------------------------------------------------------------------------------------------------------------------------------------------------------------------------------------------------------|
| Version 1.0 08Nov2019     | Original approved version                                                                                                                                                                                                                                                                                                                                                                                                                                                                                  |
| Version 2.0               | Contact details updated                                                                                                                                                                                                                                                                                                                                                                                                                                                                                    |
| Version 3.0               | <ul style="list-style-type: none"> <li>- RTTQA staff changes</li> <li>- CTV1p and CTV2p expansions updated for patients who have undergone simple (diagnostic) tonsillectomy (page 12)</li> <li>- Clarified need for CTV2 not to overlap with CTV1</li> <li>- OAR descriptions brought in line with GHG consensus guidelines where possible</li> <li>- Upper oesophagus (cervical) caudal border re-defined as suprasternal notch</li> <li>- Minor edits to data collection for proton patients</li> </ul> |

## Contents

|                                                                     |    |
|---------------------------------------------------------------------|----|
| 1. TRIAL SUMMARY .....                                              | 7  |
| 2. TRIAL SCHEMA .....                                               | 9  |
| 3. INTRODUCTION .....                                               | 10 |
| 4. PATIENT IMMOBILISATION AND IMAGE ACQUISITION .....               | 10 |
| 5. ANATOMY .....                                                    | 11 |
| 6. TARGET LOCALISATION AND OUTLINING .....                          | 13 |
| 6.1. Treatment of the neck:.....                                    | 13 |
| 6.2. Definition of target volumes.....                              | 13 |
| 6.3. Organs at Risk (OARs) delineation:.....                        | 17 |
| 6.4. Example outlining case (applicable to both IMPT and IMRT)..... | 21 |
| 7. TREATMENT PLANNING.....                                          | 24 |
| 7.1. IMRT.....                                                      | 24 |
| 7.2. IMPT.....                                                      | 24 |
| 8. VERIFICATION AND REPLANNING.....                                 | 27 |
| 9. TREATMENT INTERRUPTIONS.....                                     | 28 |
| 10. RADIOOTHERAPY QUALITY ASSURANCE .....                           | 29 |
| 11. OUTLINING BENCHMARK CASE .....                                  | 31 |
| 12. PLANNING BENCHMARK CASE.....                                    | 32 |
| 13. REFERENCES.....                                                 | 33 |

**1. TRIAL SUMMARY**

|                      |                                                                                                                                                                                                                                                                                                                                                                                                                                                                                                                                                       |
|----------------------|-------------------------------------------------------------------------------------------------------------------------------------------------------------------------------------------------------------------------------------------------------------------------------------------------------------------------------------------------------------------------------------------------------------------------------------------------------------------------------------------------------------------------------------------------------|
| Protocol title       | <b>TORPEdO - A phase III trial of intensity-modulated proton beam therapy versus intensity-modulated radiotherapy for multi-toxicity reduction in oropharyngeal cancer.</b>                                                                                                                                                                                                                                                                                                                                                                           |
| Short title          | TOxicity Reduction using Proton bEam therapy for Oropharyngeal cancer                                                                                                                                                                                                                                                                                                                                                                                                                                                                                 |
| Trial population     | Men and women aged 18 years and over with newly diagnosed oropharyngeal cancer who require concurrent chemo-radiotherapy including bilateral neck treatment.                                                                                                                                                                                                                                                                                                                                                                                          |
| Target disease       | Oropharynx cancer, both HPV positive and HPV-negative disease<br>HPV positive (TNM-8): T1-2 N1-2 (excluding T1 single ipsilateral node <3cm), T3-4 N0-2.<br>HPV negative (TNM8): T1 N2, T2 N1-N2, T3-4 N0-2<br>N3 disease excluded                                                                                                                                                                                                                                                                                                                    |
| Study objectives     | The primary aim is to assess whether intensity modulated proton therapy (IMPT) compared with intensity modulated radiotherapy treatment (IMRT) reduces toxicity in oropharyngeal squamous cell carcinoma.<br><br>The secondary aim is to validate a biomarker (NTCP-model) as a predictor of benefit from IMPT vs IMRT.                                                                                                                                                                                                                               |
| Study design         | Phase III randomised, controlled, multicentre radiation technology trial.                                                                                                                                                                                                                                                                                                                                                                                                                                                                             |
| Recruitment target   | 183 patients                                                                                                                                                                                                                                                                                                                                                                                                                                                                                                                                          |
| Trial treatment      | Consenting patients will be randomised in a 2:1 ratio to IMPT at The Christie or UCLH vs standard IMRT at the recruiting centre.<br><br>Radiotherapy doses will be same in both treatment groups: <ul style="list-style-type: none"> <li>● therapeutic dose of 70 Gy (relative biological effective (RBE) equivalent)</li> <li>● elective dose of 56 Gy (RBE equivalent)</li> <li>● delivered in 33 once daily fractions over 6.5 weeks</li> </ul>                                                                                                    |
| Chemotherapy         | Chemotherapy in the context of this trial is not an investigational medicinal product.<br><br>All patients should be suitable for concurrent platinum chemoradiotherapy. Cisplatin 100 mg/m <sup>2</sup> on day 1 and day 22 of radiotherapy will be mandated for all patients with adequate creatinine clearance (≥60 ml/min calculated by Cockcroft-Gault formula prior to randomisation). If patients subsequently develop renal impairment, ototoxicity or neuropathy, carboplatin AUC=5 may be substituted for the second cycle of chemotherapy. |
| Co-Primary endpoints | The co-primary endpoints are: <ul style="list-style-type: none"> <li>● University of Washington Quality of Life Questionnaire (UW-QoL) physical composite score</li> <li>● gastrostomy dependence or CTCAE grade 3 weight loss (i.e. ≥ 20% weight loss from baseline)</li> </ul> measured at 12 months after completion of chemoradiotherapy.                                                                                                                                                                                                         |

|                                                         |                                                                                                                                                                                                                                                                                                                                                                                                                                                                                                                                                                                                                                                                                                                                                                                                                                                                                                                                                                                                                                                                                                                                                                                                                                                                                                                                                                                                                                                                                                                                                                                                          |
|---------------------------------------------------------|----------------------------------------------------------------------------------------------------------------------------------------------------------------------------------------------------------------------------------------------------------------------------------------------------------------------------------------------------------------------------------------------------------------------------------------------------------------------------------------------------------------------------------------------------------------------------------------------------------------------------------------------------------------------------------------------------------------------------------------------------------------------------------------------------------------------------------------------------------------------------------------------------------------------------------------------------------------------------------------------------------------------------------------------------------------------------------------------------------------------------------------------------------------------------------------------------------------------------------------------------------------------------------------------------------------------------------------------------------------------------------------------------------------------------------------------------------------------------------------------------------------------------------------------------------------------------------------------------------|
| <p>Secondary endpoints</p>                              | <ul style="list-style-type: none"> <li>● Longitudinal pattern of health related quality of life (HR-QoL).</li> <li>● Tube feeding status.</li> <li>● Acute and late severe toxicity.</li> <li>● Swallowing function.</li> <li>● Performance Status Scale for Head and Neck Cancer (PSS-HN).</li> <li>● Hearing loss.</li> <li>● Trismus.</li> <li>● Resection rates.</li> <li>● Loco-regional tumour control.</li> <li>● Overall survival.</li> <li>● Cost-effectiveness.</li> </ul>                                                                                                                                                                                                                                                                                                                                                                                                                                                                                                                                                                                                                                                                                                                                                                                                                                                                                                                                                                                                                                                                                                                     |
| <p>Trial assessments and follow up</p>                  | <ul style="list-style-type: none"> <li>● <b>Audiometry and trismus</b><br/>Audiometry, and trismus by change in maximum interincisal distance, at baseline, and at 3, 12 and 24 months post treatment</li> <li>● <b>Radiological imaging (MRI/CT/PET-CT)</b><br/>At baseline, 12-14 weeks after completion of therapy, and subsequently as required by the investigator if clinical review raises the suspicion of recurrent disease.</li> <li>● <b>Evaluation of swallowing function</b><br/>100ml water swallow test and Performance Status Scale for Head and Neck Cancer (PSS-HN) at baseline, and at 3, 6, 12, 18 and 24 months following completion of study treatment.</li> <li>● <b>Quality of life assessment</b><br/>Patient Reported Outcomes (PRO) booklets containing the validated UW-QoL, EORTC QLQ-C30 and QLQ-H&amp;N43, MDADI, Work Productivity Assessment Index (WPAI-SHP) (only until 24 months), EuroQol five-dimensional questionnaire (EQ-5D-5L) (only until 24 months) and Healthcare resource-use (only until month 12) instruments will be given to the patient in clinic at baseline, at the end of treatment, 6 weeks post-treatment, and then sent to the patient’s home address for completion at 3, 6, 12, 18, 24, 36, 48, and 60 months.</li> <li>● <b>Clinical follow-up is consistent with routine practice</b><br/>Patients will be assessed weekly during treatment, 6 weeks post-treatment, and at 3, 6, 12, 18 and 24 months post-treatment. For the purposes of the trial, subsequent routine follow-up data will be collected annually in years 3-5.</li> </ul> |
| <p>Imaging and physics-based translational research</p> | <p>(1) Pre-accrual (benchmarking) and during-accrual (recruited patient) DICOM-RT and associated non-DICOM data will be collected to validate and develop improved NTCP models and refine patient selection for IMPT.</p> <p>(2) Image-based data mining of DICOM data is planned to correlate per-voxel radiotherapy doses.</p>                                                                                                                                                                                                                                                                                                                                                                                                                                                                                                                                                                                                                                                                                                                                                                                                                                                                                                                                                                                                                                                                                                                                                                                                                                                                         |
| <p>Optional biological sample collection</p>            | <p>Archival diagnostic tissue and blood samples will be requested from all consenting patients. Blood samples will be collected at baseline, during and post treatment up to the 3 month (post treatment) timepoint.</p>                                                                                                                                                                                                                                                                                                                                                                                                                                                                                                                                                                                                                                                                                                                                                                                                                                                                                                                                                                                                                                                                                                                                                                                                                                                                                                                                                                                 |
| <p>Optional MRI imaging sub study</p>                   | <p>Patients receiving treatment at The Christie Hospital (either IMPT or IMRT) will be asked to have an additional diffusion-weighted (DW)-MRI. Separate patient information will be provided regarding this sub study.</p>                                                                                                                                                                                                                                                                                                                                                                                                                                                                                                                                                                                                                                                                                                                                                                                                                                                                                                                                                                                                                                                                                                                                                                                                                                                                                                                                                                              |



## 2. TRIAL SCHEMA

Patients >18 years' old with oropharyngeal cancer, either HPV positive or HPV-negative disease,  
 (HPV positive [TNM-8] T1-2 N1-2 (excluding T1 with a single ipsilateral node <3cm), T3-4 N0-2;  
 HPV negative [TNM-8] T1N2, T2N1-N2, T3-4N0-2  
 p16 status (p16<sup>InK4A</sup> IHC/ISH)  
 Planned treatment is curative chemo-radiotherapy with bilateral neck treatment

**CONSENT**

**RANDOMISATION 2:1** (IMPT vs standard IMRT)

**IMPT: The Christie or UCLH**

70Gy(RBE)/56Gy(RBE) in 33# (6.5 weeks)

**IMRT: Randomising Centre**

70Gy/56Gy in 33# (6.5 weeks)

### Baseline assessments

Patient reported outcomes (PRO): University of Washington Quality of Life (UW-QoL), EORTC QLQ-C30 and QLQ-H&N43, M. D. Anderson Dysphagia Inventory (MDADI), health economics (Healthcare resource-use, EQ-5D-5L and Work Productivity Assessment Index (WPAI-SHP)) questionnaires

Audiometry

Baseline signs and symptoms (CTCAE v 5.0)

Weight and WHO Performance Status (WHO PS)

Feeding tube status

Maximum interincisal distance to assess trismus

Evaluation of swallowing dysfunction using the 100mL Water Swallow Test

Diet and eating scores evaluated using the Performance Status Scale for Head and Neck Cancer

### Follow-up assessments

#### Weeks 1-6 on treatment

Clinician-reported toxicities (CTCAE v 5.0) & physician-rated dysphagia scores.

Feeding tube status, weight, and WHO PS

#### End of treatment (week 7) and 6 weeks post treatment

PRO (UW-QoL, EORTC QLQ-C30, QLQ-H&N43, MDADI, EQ-5D-5L, WPAI-SHP)

Clinician-reported toxicities (CTCAE v 5.0)

Feeding tube status, weight, and WHO PS

#### 3, 6, 12, 18 and 24 months post-treatment

PRO (UW-QoL, EORTC QLQ-C30, QLQ-H&N43, MDADI, EQ-5D-5L, WPAI-SHP)

Healthcare resource-use (3 months, 6 months, 12 months)

Clinician-reported toxicity (CTCAE v 5.0 & LENT SOMA)

Feeding tube status, weight, and WHO PS

Audiometry and maximum interincisal distance to assess trismus (3, 12 and 24 months only)

100mL Water Swallow Test, Diet and Eating scores evaluated using the PSS-HN.

Clinical response assessment

Radiological assessment at 3 months

#### 3, 4 and 5 years post-treatment

PRO (UW-QoL, EORTC QLQ-C30, QLQ-H&N43, MDADI, EQ-5D)

Assessment for recurrence and survival only.

**Optional Biological Sample Collection:** Archival diagnostic tissue and blood samples will be requested from all consenting patients. Blood samples will be collected at baseline, during and post treatment up to the 3-month (post treatment) timepoint.

**Optional MRI imaging sub study:** Patients receiving treatment at the Christie Hospital (either IMPT or IMRT) will be asked to have an additional diffusion-weighted (DW) MRI at baseline and then at week 3 during their treatment.

### 3. INTRODUCTION

Patients entered in the TORPEdO trial are randomised to receive either intensity modulated proton therapy (IMPT) at The Christie (Manchester) or UCLH (London), or intensity modulated radiotherapy (IMRT) at their local radiotherapy centre.

Radiotherapy treatment should commence as soon as possible and ideally within 4 weeks after randomisation.

For IMPT and IMRT, treatment is via a simultaneous integrated boost in a single phase, as follows:

- 70Gy(RBE) in 33 fractions (2.12 Gy(RBE) per fraction) over 6.5 weeks to the therapeutic clinical target volume (CTV1) for IMPT, and the therapeutic planning target volume (PTV1) for IMRT.
- 56Gy(RBE) in 33 fractions (1.70Gy(RBE) per fraction) over 6.5 weeks to areas at risk of microscopic disease (CTV2 for IMPT, and PTV2 for IMRT).

In this document the RBE weighted dose in units of Gy(RBE) is used to describe the product of the absorbed dose and the RBE. For protons, the RBE should be interpreted as 1.1. For photons this should be interpreted as 1 for which Gy(RBE) is equivalent to the absorbed dose in Gy.

Radiotherapy planning and outlining should be carried out in accordance with the guidelines in the current version of the TORPEdO Radiotherapy Treatment Planning and Delivery and QA guidelines available on request from ICR-CTSU (TORPEdO-icrctsu@icr.ac.uk) or found on the Radiotherapy Trials Quality Assurance (RTTQA) website [www.rtrialsqa.org.uk](http://www.rtrialsqa.org.uk).

### 4. PATIENT IMMOBILISATION AND IMAGE ACQUISITION

All patients should be immobilised in a supine position using a 5-point customised thermoplastic shell.

Patients should undergo a radiotherapy planning CT scan in the immobilisation shell, with a maximum CT slice thickness of 3mm, from the vertex of the skull superiorly to the carina inferiorly.

For both IMPT and IMRT planning scans, the use of intravenous contrast is recommended in order to facilitate optimal delineation. For IMPT, an additional pre-contrast scan should be acquired and rigidly co-registered with the post-contrast scan.

An MRI scan of the neck, either diagnostic or in the treatment position, is also recommended to aid delineation of the target volumes and organs at risk. Rigid or deformable registration of the MRI scan with the planning CT may be helpful, depending on a clinical assessment of the quality of co-registration.

## 5. ANATOMY

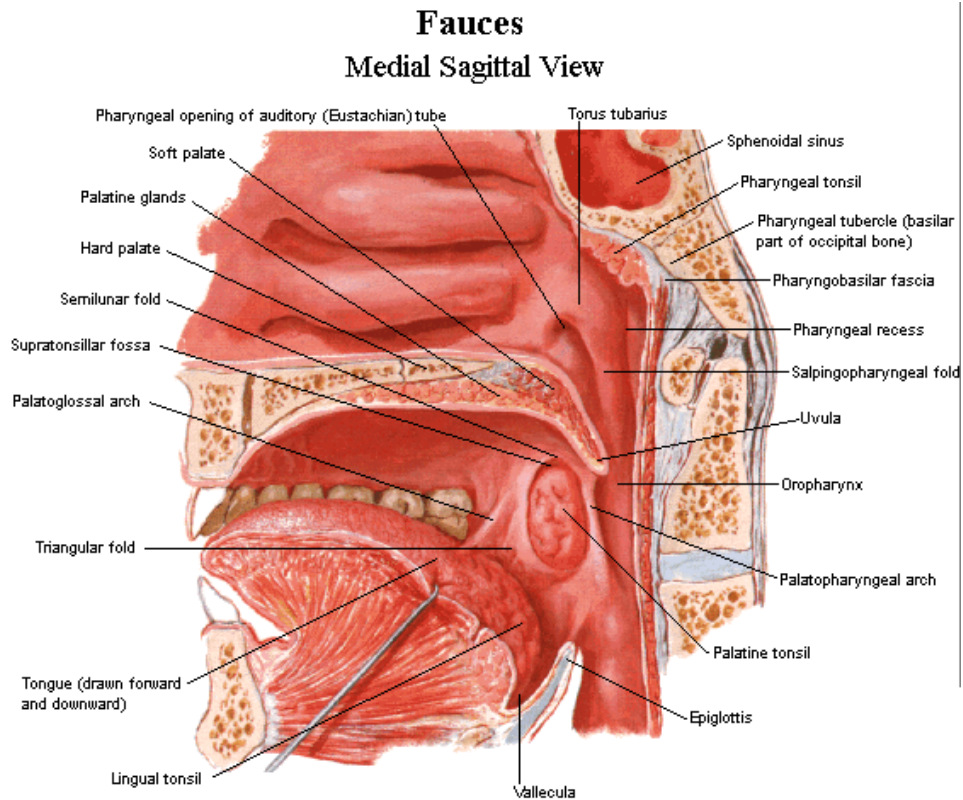

Figure 1 – anatomy of the oropharynx, sagittal view<sup>1</sup>

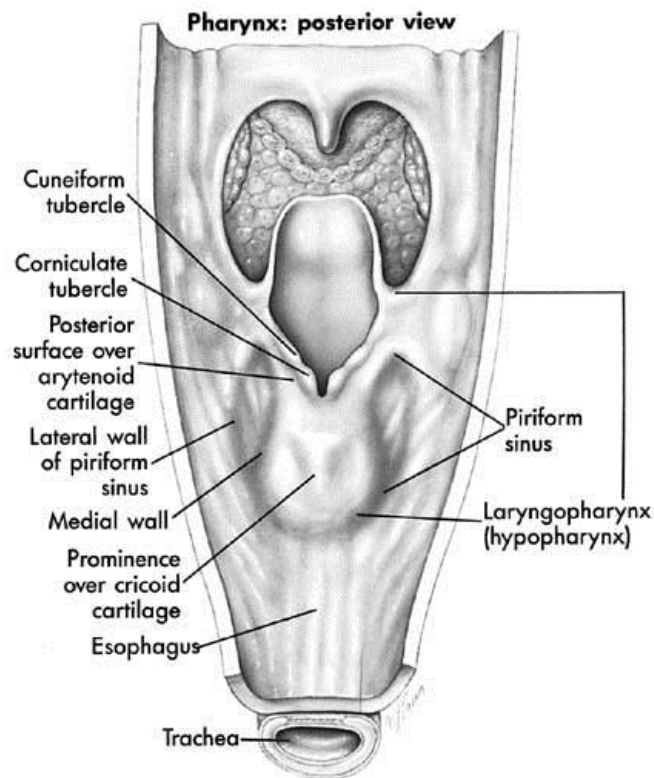

Figure 2 – anatomy of the pharynx, posterior view<sup>2</sup>

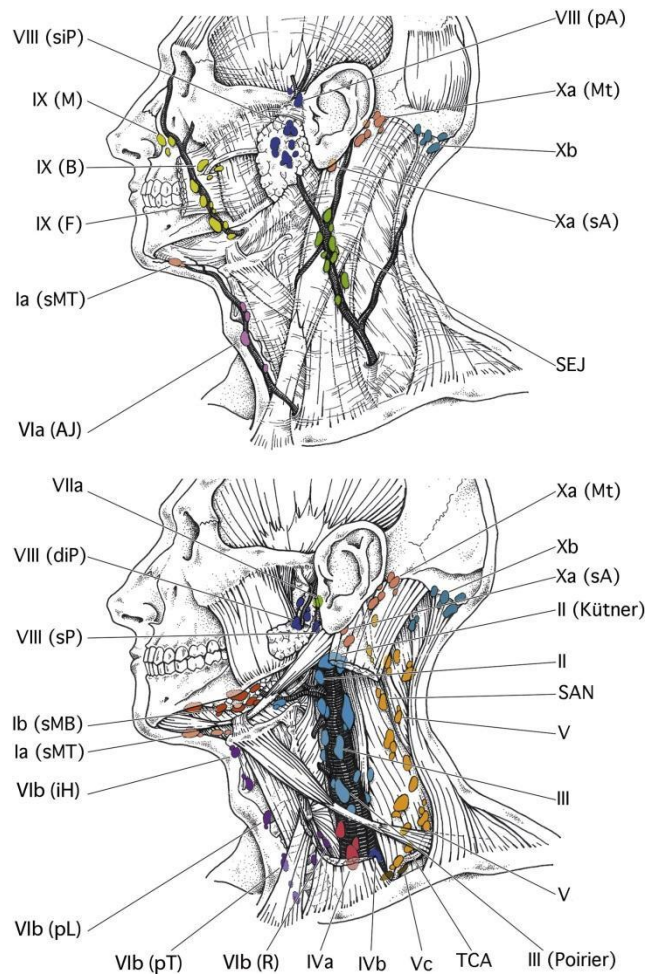

Figure 3 – superficial and deep lymphatic nodal groups of the head and neck<sup>3</sup>

## 6. TARGET LOCALISATION AND OUTLINING

### **6.1. Treatment of the neck:**

- The TORPEdO trial requires that all patients undergo bilateral neck irradiation, i.e., those patients with non-lateralised tumours, bilaterally involved lymph nodes, **or** lateralised tumours with multiple ipsilateral nodes.
- Lateralised tumours are defined as
  - tumours of the tonsillar fossa / lateral pharyngeal wall with <1cm medial disease extension AND >1cm clearance from the midline, **and**
  - Without any soft palate, base of tongue or posterior pharyngeal wall involvement.

### **6.2. Definition of target volumes**

- The *primary tumour clinical target volumes* are defined according to the 2017 consensus guidelines by Gregoire et al<sup>4</sup>, using a “5mm + 5mm” expansion of the primary tumour gross tumour volume (GTVp) to create CTV1p and CTV2p respectively.
- Following geometric expansion, contours should be edited for air cavities, and for anatomic boundaries to tumour spread (e.g. bone and fascia). In some circumstances, CTV2p contours should be edited off adjacent anatomical structures dependent on the oropharyngeal sub-site and T-stage as described in the consensus guidelines<sup>4</sup>, and outlined in Table 1.
- A 10mm expansion to create CTV1p may be used in place of the “5mm + 5mm” approach at the discretion of the treating oncologist in the following instances:
  - For indistinct primary tumours
  - Where a patient has undergone simple tonsillectomy and the pre-tonsillectomy GTVp was not apparent on diagnostic imaging, the tonsillar bed should be outlined and a 10mm expansion applied to form CTV1p. However, if the pre-tonsillectomy diagnostic imaging demonstrates the GTVp, the pre-tonsillectomy GTVp should be recreated and standard expansions applied to form CTV1p and CTV2p.
- The *nodal clinical target volume* (CTV1n) is defined by a 10mm isotropic expansion from the nodal GTV(s).
- At-risk lymph node levels (CTV2n) are defined according to Table 2 (below) and will receive an elective dose of 56Gy(RBE).
- The delineation of lymph node levels for elective radiation is defined by the 2013 consensus guidelines by Gregoire et al<sup>3</sup>. An illustrative atlas is available online (<https://www.rtog.org/LinkClick.aspx?fileticket=uQmTal3efxE%3d&tabid=229>)
- CTV1 and CTV2 will receive 70 Gy(RBE) and 56 Gy(RBE) respectively, in 33 once daily fractions of 2.12 Gy(RBE) and 1.70 Gy(RBE) respectively, Monday-Friday over 6.5 weeks.
- Trial nomenclature for target volumes is given in Table 3.

Table 1: Summarising where, following expansion from GTVp and after editing for air and barriers to spread, CTV2p should be edited off adjacent anatomical structures:

|                                  | <b>T1 tumours</b>                   | <b>T2 tumours</b>                                        | <b>T3 tumours</b>                   | <b>T4 tumours</b> |
|----------------------------------|-------------------------------------|----------------------------------------------------------|-------------------------------------|-------------------|
| <b>Tonsil</b>                    | Edit CTV2p off parapharyngeal space | Edit CTV2p off medial pterygoid muscle                   |                                     |                   |
| <b>Soft palate</b>               |                                     | Edit CTV2p off medial pterygoid muscle and mobile tongue | Edit CTV2p off mobile tongue        |                   |
| <b>Posterior pharyngeal wall</b> |                                     | Edit CTV2p off pre-vertebral fascia                      | Edit CTV2p off pre-vertebral fascia |                   |
| <b>Vallecular</b>                | Edit CTV2p off pre-epiglottic space |                                                          |                                     |                   |
| <b>Base of tongue</b>            | Edit CTV2p off hyo-glossus muscle   |                                                          |                                     |                   |

Table 2: Selection of Nodal Levels for Elective Radiotherapy:

| <b>Node-positive neck<sup>#</sup></b>                                                                                                                                                                                                                                                                                                                                                                                                               | <b>Ipsilateral node-negative neck</b> | <b>Contralateral node-negative neck</b>                                                                                                                                                                                                                                                                                                                                                                                                                            |
|-----------------------------------------------------------------------------------------------------------------------------------------------------------------------------------------------------------------------------------------------------------------------------------------------------------------------------------------------------------------------------------------------------------------------------------------------------|---------------------------------------|--------------------------------------------------------------------------------------------------------------------------------------------------------------------------------------------------------------------------------------------------------------------------------------------------------------------------------------------------------------------------------------------------------------------------------------------------------------------|
| <p>Levels Ib, II, III, IVa, Va, Vb, VIIa<sup>†</sup>, VIIb<sup>‡</sup></p> <p><sup>#</sup>where level IVa or Vb is involved, include levels IVb and Vc (i.e. the medial and lateral supraclavicular fossa)</p> <p><sup>†</sup>we recommend that the cranial border of level VIIa is defined as the upper edge of the body of C1 or the upper extent of the hard palate, whichever is more cranial</p> <p><sup>‡</sup>where level II is involved</p> | <p>Levels II, III, IVa, VIIa</p>      | <p>Levels II<sup>§</sup>, III, IVa, (VIIa-)</p> <p><sup>§</sup>for the contralateral node-negative neck only, the cranial border of level II is defined as where the internal jugular vein crosses the posterior belly of the jugulodigastric muscle<sup>5</sup> – see figure 4</p> <p>-If the primary tumour involves the posterior pharyngeal wall or arises from / extends &gt;1 cm on to the soft palate <b>or</b> if there is ipsilateral VII involvement</p> |

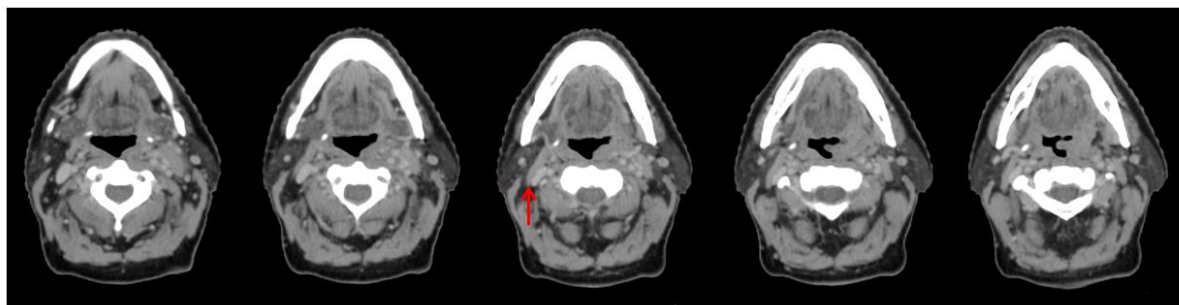

Figure 4 – series of axial CT slices illustrating where the internal jugular vein crosses the posterior belly of the digastric muscle (red arrow). This slice represents the cranial extent of CTV2n for the contralateral node negative neck. Left to right: inferior to superior.

Table 3. Trial nomenclature for target volumes

| Volume                                                                                               | Trial nomenclature |
|------------------------------------------------------------------------------------------------------|--------------------|
| GTV primary                                                                                          | GTVp               |
| GTV involved nodes                                                                                   | GTVn               |
| CTV high risk primary                                                                                | CTV1p              |
| CTV high risk nodal                                                                                  | CTV1n              |
| Clinical target volume high risk                                                                     | CTV1               |
| CTV primary elective                                                                                 | CTV2p              |
| CTV nodal elective                                                                                   | CTV2n              |
| Clinical target volume elective                                                                      | CTV2               |
| PTV high risk                                                                                        | PTV1               |
| PTV low risk elective                                                                                | PTV2               |
| PTV high risk cropped for skin build up and overlap with a margin around critical structure          | PlanPTV1           |
| PTV low risk elective cropped for skin build up and overlap with a margin around critical structure  | PlanPTV2           |
| CTV high risk cropped for skin build up and overlap with a margin around critical structures         | PlanCTV1           |
| CTV low risk elective cropped for skin build up and overlap with a margin around critical structures | PlanCTV2           |

### **Step 1 – outline primary tumour and nodal GTVs**

Using all available information, e.g. findings of clinical examination, examination under anaesthesia, diagnostic imaging (CT, MRI +/- PET-CT), delineate gross tumour volumes (GTV) for the primary tumour (GTVp) and involved nodes (GTVn).

### **Step 2 – create CTV1**

Add a 5mm isotropic margin to GTVp to create CTV1p (see text above for instances where a 10mm expansion may be used).

Add a 10mm isotropic margin to GTVn to create CTV1n.

Edit for air cavities and anatomical barriers to spread e.g. bone and fascia (including platysma).

Combine CTV1p and CTV1n to create the final CTV1.

Note:

- The entire involved lymph node level is **not** included in CTV1
- In the presence of clinical/radiological extra-nodal extension (cENE), CTV1 should not include the entirety of the sternocleidomastoid muscle.

### **Step 3 – create CTV2**

Add a 10mm isotropic margin to GTVp to create CTV2p.

Edit for air cavities, anatomical barriers to spread (e.g. bone and fascia) and, where appropriate, for adjacent anatomical structures (see Table 1).

Outline CTV2n, including all uninvolved nodal levels that are at risk of microscopic disease (see Table 2).

Combine CTV2p and CTV2n to create the final CTV2.

Subtract CTV1 from CTV2 so ensure no overlap of CTV volumes.

### **Step 4 – create PTV1 and PTV2**

For IMRT, the Planning Target Volumes (PTVs) constitutes an isotropic expansion of Clinical Target Volumes as per International Commission of Radiation Units (ICRU) reports 50, 62 and 83. PTVs are not edited.

The size of the margin will vary amongst treating institutions, reflecting the degree of geometric uncertainty present in their planning process, but will typically be 3 - 5mm.

For IMPT, whilst a PTV may be created to aid optimisation, plans will be evaluated under uncertainty.



**6.3. Organs at Risk (OARs) delineation:**

The descriptions below have been adopted from the Global Harmonization Group organ at risk consensus contouring guidelines<sup>12</sup>[REF]. The brachial plexus (IMPT patients only) will be delineated according to Hall et al<sup>8</sup> and the ADSCaN trial OAR atlas<sup>9</sup>. Table 4 details the normal tissue structures that should be contoured.

*Table 4. Organs at Risk (OARS) for delineation*

| Nomenclature                       | Descriptor                                                                                                                                                                                                                                                                                                                                                                                                                                                                                                                                                          |
|------------------------------------|---------------------------------------------------------------------------------------------------------------------------------------------------------------------------------------------------------------------------------------------------------------------------------------------------------------------------------------------------------------------------------------------------------------------------------------------------------------------------------------------------------------------------------------------------------------------|
| SpinalCord                         | Outline the true spinal cord (not the spinal canal) from the tip of the dens of C2 (cranial border) to the upper edge of T3 (caudal border)                                                                                                                                                                                                                                                                                                                                                                                                                         |
| SpinalCord_PRVX (where X = margin) | An isotropic expansion of 3-5mm (according to local practice and adequacy of immobilisation)                                                                                                                                                                                                                                                                                                                                                                                                                                                                        |
| Brainstem                          | Outline the entire brainstem from the substantia nigra at the cerebral peduncle (cranial border; the cranial aspect of the posterior clinoid process may be used as a bony landmark) to the level of the tip of the dens of the C2 vertebra (caudal border)                                                                                                                                                                                                                                                                                                         |
| Brainstem_PRVX (where X = margin)  | An isotropic expansion of 3-5mm (according to local practice and adequacy of immobilisation)                                                                                                                                                                                                                                                                                                                                                                                                                                                                        |
| Parotid_R and Parotid_L            | <p>The anatomic boundaries of the parotid gland are as follows:</p> <ul style="list-style-type: none"> <li>• Cranial – zygomatic arch</li> <li>• Caudal – angle of mandible</li> <li>• Anterior - masseter muscle</li> <li>• Posterior - anterior aspect of sternocleidomastoid muscle</li> <li>• Lateral - platysma muscle</li> <li>• Medial - posterior belly of digastric muscle, styloid process, parapharyngeal space</li> </ul> <p>Within the tissue of the parotid gland, include the carotid artery, retromandibular vein and extracranial facial nerve</p> |
| GlnD_Submand_R and GlnD_Submand_L  | <p>The anatomic boundaries of the submandibular gland are as follows:</p> <ul style="list-style-type: none"> <li>• Cranial - caudal edge of medial pterygoid muscle at the level of the C3 vertebral body</li> <li>• Caudal - fatty tissue</li> <li>• Lateral - platysma muscle, mandibular surface</li> <li>• Medial - lateral surface of mylohyoid muscle, anterior belly of digastric muscle</li> </ul>                                                                                                                                                          |
| Cavity_Oral                        | Posterior to mandible and maxilla and not to include the inner surface of the lips; the anatomic boundaries are as                                                                                                                                                                                                                                                                                                                                                                                                                                                  |

|                  |                                                                                                                                                                                                                                                                                                                                                                                                                                                                                                                                                                                                                                  |
|------------------|----------------------------------------------------------------------------------------------------------------------------------------------------------------------------------------------------------------------------------------------------------------------------------------------------------------------------------------------------------------------------------------------------------------------------------------------------------------------------------------------------------------------------------------------------------------------------------------------------------------------------------|
|                  | <p>follows:</p> <ul style="list-style-type: none"> <li>• Cranial – include hard palate mucosa, mucosal reflections near maxilla</li> <li>• Caudal – base of tongue mucosa and hyoid posteriorly, include mylohyoid muscle and anterior belly of the digastric muscle anteriorly</li> <li>• Posterior – include posterior borders of soft palate, uvula and (more inferiorly) the base of tongue</li> <li>• Antero-lateral – inner surface of the mandible and maxilla</li> </ul>                                                                                                                                                 |
| Glottis          | <p>Includes the vocal cords and paraglottic fat; the anatomic boundaries are as follows:</p> <ul style="list-style-type: none"> <li>• Cranial – cranial edge of arytenoid cartilages</li> <li>• Caudal – caudal edge of anterior part of thyroid cartilage</li> <li>• Posterior – cricoid, anterior border of arytenoids</li> <li>• Antero-lateral – thyroid cartilage</li> <li>• Medial – pharyngeal lumen (exclude air)</li> </ul>                                                                                                                                                                                             |
| Larynx_SG        | <p>The supraglottic larynx is a soft tissue structure including the epiglottis, supraglottic adductor muscles, aryepiglottic folds, arytenoid cartilages and false vocal cords. The anatomic boundaries are as follows:</p> <ul style="list-style-type: none"> <li>• Cranial – include tip of epiglottis</li> <li>• Caudal – cranial edge of arytenoid cartilages</li> <li>• Anterior – hyoid bone, pre-epiglottic space, thyroid cartilage</li> <li>• Posterior – inferior pharyngeal constrictor muscle, pharyngeal lumen</li> <li>• Lateral – thyroid cartilage</li> <li>• Medial – pharyngeal lumen (exclude air)</li> </ul> |
| Musc_Constrict_S | <p>The anatomic boundaries of the superior pharyngeal constrictor muscles are as follows:</p> <ul style="list-style-type: none"> <li>• Cranial – caudal tip of the pterygoid plates (pterygoid hamulus)</li> <li>• Caudal – lower edge of C2 vertebral body</li> <li>• Anterior – pterygoid hamulus, posterior end of mandible, base of tongue</li> <li>• Posterior – prevertebral muscle</li> <li>• Lateral – medial pterygoid muscle, para-pharyngeal space</li> </ul>                                                                                                                                                         |
| Musc_Constrict_M | <p>The anatomic boundaries of the middle pharyngeal constrictor muscles are as follows:</p>                                                                                                                                                                                                                                                                                                                                                                                                                                                                                                                                      |

|                         |                                                                                                                                                                                                                                                                                                                                                                                                                                                                                                                          |
|-------------------------|--------------------------------------------------------------------------------------------------------------------------------------------------------------------------------------------------------------------------------------------------------------------------------------------------------------------------------------------------------------------------------------------------------------------------------------------------------------------------------------------------------------------------|
|                         | <ul style="list-style-type: none"> <li>• Cranial – upper edge of C3 vertebral body</li> <li>• Caudal – lower edge of hyoid bone</li> <li>• Anterior – tongue base, hyoid bone</li> <li>• Posterior – prevertebral muscle</li> </ul>                                                                                                                                                                                                                                                                                      |
| Musc_Constrict_I        | <p>The anatomic boundaries of the inferior pharyngeal constrictor muscles are as follows:</p> <ul style="list-style-type: none"> <li>• Cranial – lower edge of hyoid bone</li> <li>• Caudal – lower edge of arytenoid cartilages</li> <li>• Anterior – posterior edge of thyroid cartilage</li> <li>• Posterior – prevertebral muscle</li> <li>• Lateral – superior horn of thyroid cartilage</li> </ul>                                                                                                                 |
| Inlet_Cricophar         | <p>The cricopharyngeal inlet encompasses the cricopharyngeal muscle and the oesophageal inlet; the anatomic boundaries are as follows:</p> <ul style="list-style-type: none"> <li>• Cranial - lower edge of arytenoid cartilages</li> <li>• Caudal - 10mm caudal to lower edge of cricoid cartilage</li> <li>• Anterior - posterior edge of the cricoid cartilages</li> <li>• Posterior - prevertebral muscle</li> <li>• Lateral - thyroid cartilage, fatty tissue, thyroid gland (include all muscle layers)</li> </ul> |
| Oesophagus_S            | <p>The anatomic boundaries of the cervical oesophagus are as follows:</p> <ul style="list-style-type: none"> <li>• Cranial – 10mm caudal to lower edge of cricoid cartilage</li> <li>• Caudal – suprasternal notch</li> </ul>                                                                                                                                                                                                                                                                                            |
| Fossa_Posterior         | <p>The posterior fossa includes the brainstem (as contoured previously) and cerebellum; the anatomic borders are as follows:</p> <ul style="list-style-type: none"> <li>• Superior - tentorium</li> <li>• Inferior - foramen magnum</li> <li>• Anterior – anterior edge of brainstem</li> <li>• Posterior – posterior extension of meninges to inner table of skull</li> <li>• Lateral - Lateral extension of meninges around cerebellum</li> </ul>                                                                      |
| Bone_Mandible           | <p>The mandible is defined as the entire mandible bone from the temporo-mandibular junction to the symphysis menti and excludes teeth.</p> <p>The use of CT bone windows is recommended.</p>                                                                                                                                                                                                                                                                                                                             |
| Cochlea_R and Cochlea_L | <p>The cochlea is embedded in the temporal bone, located lateral to the internal auditory meatus and is best visualised</p>                                                                                                                                                                                                                                                                                                                                                                                              |

|                                          |                                                                                                                                                                                                                                                                                                                                                                                                                                                                                                                                                                                                                                                                                     |
|------------------------------------------|-------------------------------------------------------------------------------------------------------------------------------------------------------------------------------------------------------------------------------------------------------------------------------------------------------------------------------------------------------------------------------------------------------------------------------------------------------------------------------------------------------------------------------------------------------------------------------------------------------------------------------------------------------------------------------------|
|                                          | <p>on CT bone windows. The cochleae appear as small curved or round lucencies in the petrous portion of the temporal bone</p> <p>The cochleae lie caudal to the semicircular canals, lateral to the internal auditory meatus, anterior to the vestibular apparatus and medial to the middle ear. The structure is small and measures up to 0.6cc; exclude the semi-circular canals.</p>                                                                                                                                                                                                                                                                                             |
| <p>BrachialPlex_R and BrachialPlex_L</p> | <p>The brachial plexus should be contoured for IMPT patients only</p> <p>The defined ipsilateral brachial plexus originates from the spinal nerves exiting the neural foramina on the involved side from around C5 to T2</p> <p>For the purposes of this protocol, nerve roots from C5 to T1 inclusive will be contoured as well as the main trunk of the brachial plexus, using the subclavian and axillary vessels as a surrogate for identifying the location of the plexus</p> <p>This neurovascular complex will be contoured starting proximally at C5 and following along the route of the subclavian artery ending after the neurovascular structures cross the 2nd rib</p> |

#### **6.4. Example outlining case (applicable to both IMPT and IMRT)**

Oropharynx, left base of tongue SCC, p16 positive – T2 N2a M0 (TNM7), T2 N1 M0 (TNM8)

Clinical information: A 56 year old man presenting with a 3 month history of odynophagia, and a 1 month history of left neck swelling. He is otherwise fit and well with no co-morbidity.

MRI neck: left tongue base mass measuring 23 x 14 x 16mm. Enlarged lymph node (25 x 32 x 22mm) in left level II.

FNA & cytology left level II node: suspicious for squamous cell carcinoma

Tongue base biopsy: poorly differentiated squamous cell carcinoma, p16 positive

**Step 1** - outline primary tumour and nodal GTVs (GTVp and GTVn), as shown in figure 5 (both in orange).

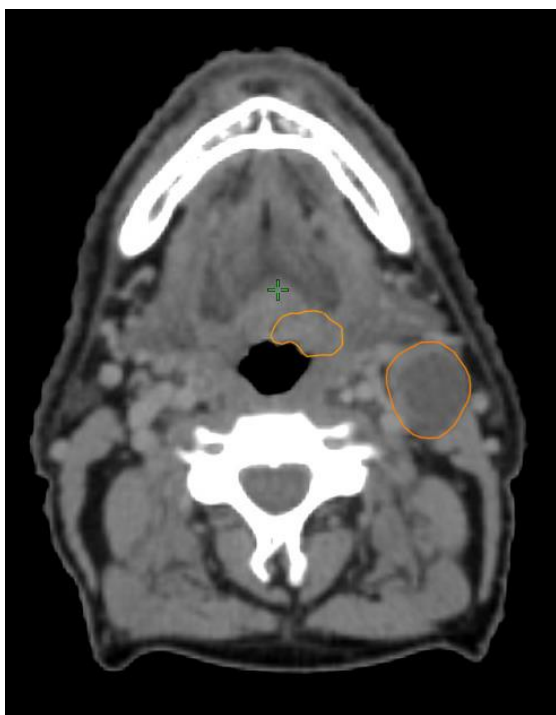

*Figure 5*

**Step 2** - add a 5mm isotropic margin to the primary tumour GTV (GTVp) to create CTV1p, and a 10mm isotropic margin to the nodal GTV (GTVn) to create CTV1n (figure 6). Edit for air cavities, anatomical barriers to spread e.g. bone and fascia (including platysma) and combine to create the final CTV1, as shown in figure 7.

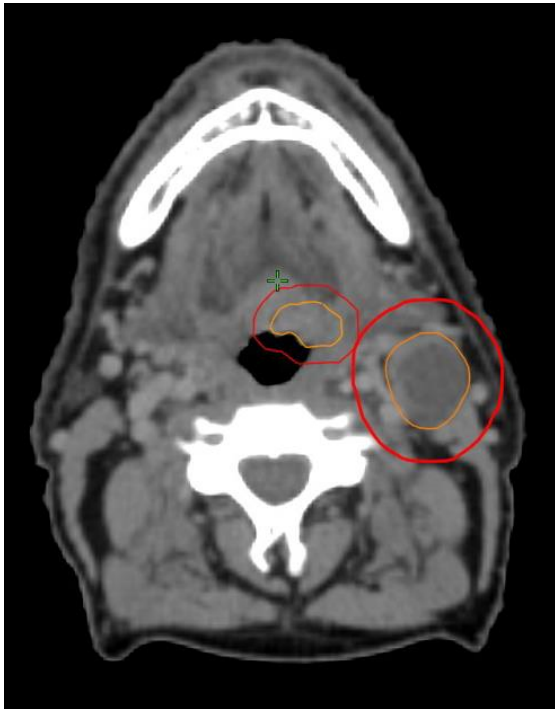

Figure 6

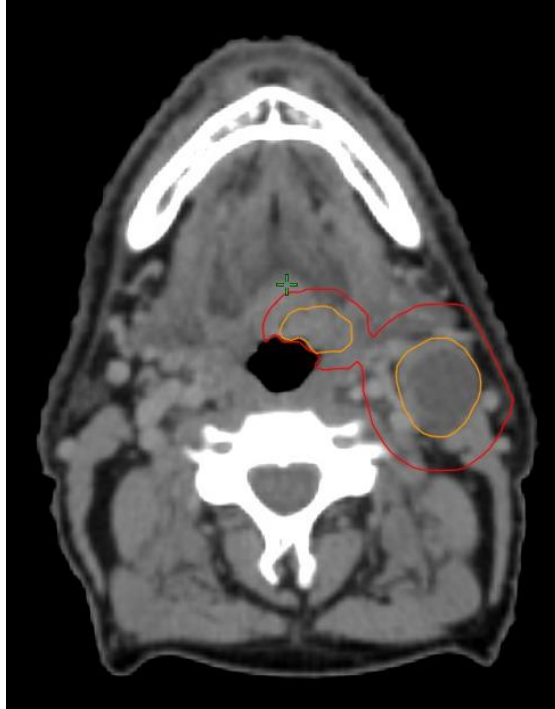

Figure 7

**Step 3** – add a 10mm isotropic margin to GTVp to create CTV2p (figure 8). Edit for air cavities and anatomical barriers to spread e.g. bone, air, and fascia (including platysma), and ensure CTV2 does not overlap with CTV1n (figure 9).

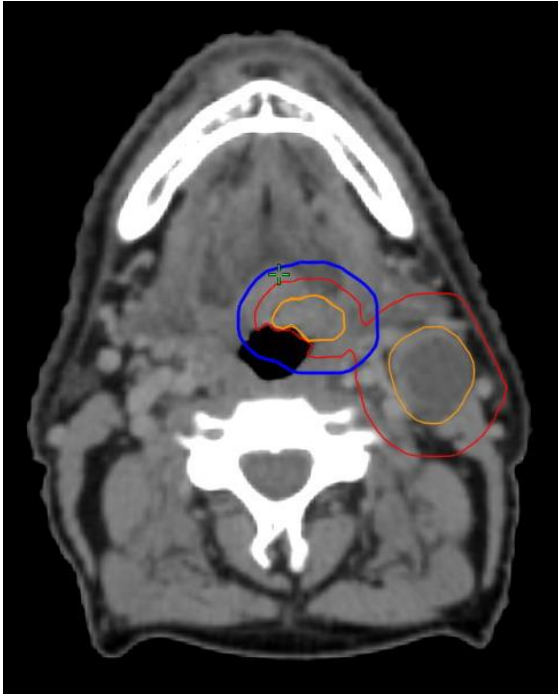

Figure 8

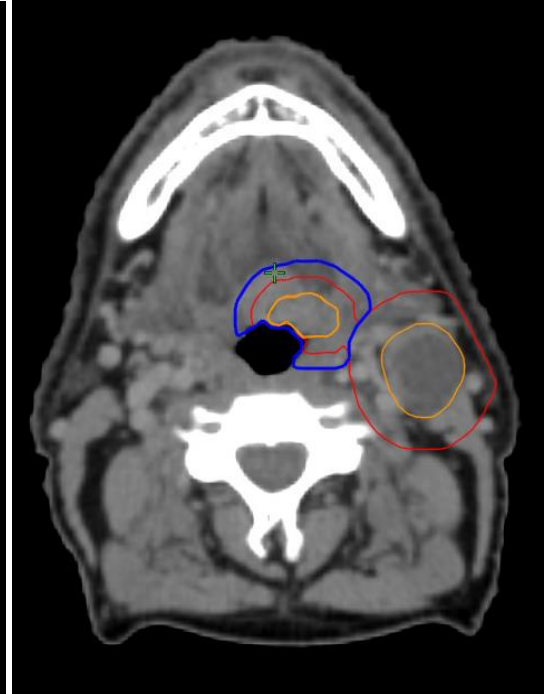

Figure 9

Outline the elective nodal volume (CTV2n) and combine with CTV2p to form the final CTV2 (figure 10).

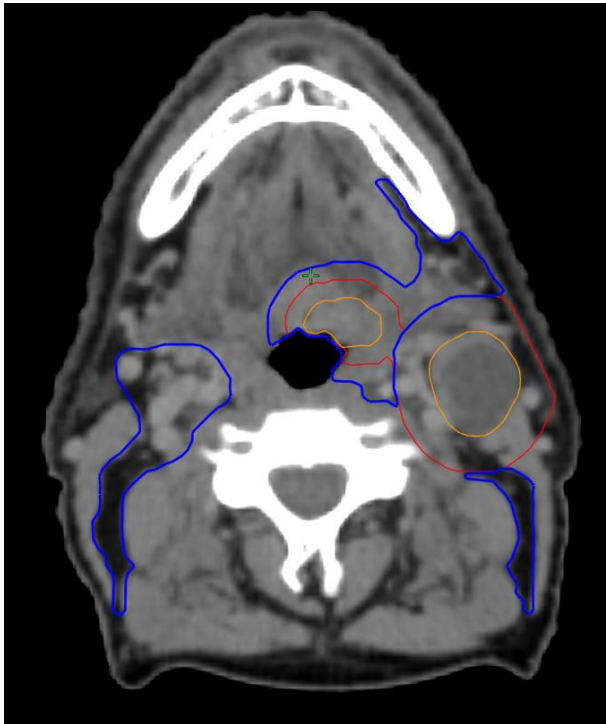

Figure 10

## 7. TREATMENT PLANNING

Planning aims should be prioritised according to Table 5.

Mandatory and optimal dose constraints for critical and other organs-at-risk are given in Tables 6 and 7 respectively. Target volume constraints are given in Table 8.

Plans will be prescribed to the mean (or median) of PlanCTV1 (IMPT) or PlanPTV1 (IMRT).

### 7.1. IMRT

Photon irradiation will be inverse planned IMRT or rotational arc therapy (e.g. Rapid Arc™, VMAT™ or Tomotherapy™). IMRT planning should follow ICRU 83.

Mandatory spinal cord and brainstem constraints are to the planning risk volume, which is typically a 3-5mm expansion. If these PRV overlap with PTVs, a PlanPTV (excluding a margin around the PRVs) can be created to aid optimisation, with PTV1 prioritised over PTV2. Target constraints are specified in table 6 for photon PTVs.

#### Density override volumes:

An additional structure should be created that covers all artefacts caused by dental fillings, as well as the high density regions where intravenous contrast had been injected. The density of the contoured are should be overridden to a bulk density of 0 HU.

#### Dose prescription and calculation:

The dose should be prescribed to the median PlanPTV rather than the unedited original volume, to avoid the low dose build-up unbalancing the overall dose.

Centres unable to prescribe to the median dose due to their planning system capabilities can alternatively prescribe to the mean dose and should inform the QA team of this decision. The median and mean dose should both be reported on the plan assessment form and are expected to be within 0.5 Gy of each other. Centres with any issues regarding the median/mean dose prescription should contact the QA team.

### 7.2. IMPT

Proton irradiation will be using pencil beam scanning. Multi-field optimisation is required due to complex target volumes, requiring field-specific targets to achieve adequate normal tissue sparing. It is desirable to cover each region of the target volumes with at least two fields.

The doses to targets and critical OARs shall be evaluated by recalculating plans in a number of error scenarios accounting for a setup error of 3-5mm and appropriate range uncertainty. If these volumes overlap with CTVs, a technical CTV volume (excluding a margin around OARs) can be created to aid optimisation, with CTV1 prioritised over CTV2. Target constraints are specified in Table 6 for proton CTVs, evaluated under setup and range uncertainty.

Beam angles will be chosen with consideration to:

- Non biological implants (particularly of unknown composition e.g. amalgam).
- CT artefacts.
- Regions of variable heterogeneity e.g. sinus.
- Avoiding entering through shoulders



- Multiple beams terminating at the same point on the brainstem, optics or spinal cord where RBE uncertainties can present an unaccounted for risk should be avoided.
- Reducing the volume of posterior normal tissue irradiated.  
Where beams enter through the couch, the couch should be appropriately modelled in the treatment planning system.

*Table 5: Planning priority order for photon and proton planning. The order differs due to treatment of level Ib (including the submandibular gland) on both sides of the neck for bilateral involved neck nodes*

| <b>Unilateral involved neck node planning priority</b> | <b>Bilateral involved neck node planning priority</b> |
|--------------------------------------------------------|-------------------------------------------------------|
| Critical structures – spinal cord, brainstem           | Critical structures – spinal cord, brainstem          |
| Target coverage CTV1/PTV1                              | Target coverage CTV1/PTV1                             |
| Target coverage CTV2/PTV2                              | Target coverage CTV2/PTV2                             |
| Contralateral parotid                                  | Contralateral parotid                                 |
| Oral Cavity                                            | Oral Cavity                                           |
| Contralateral submandibular gland                      | Superior and middle pharyngeal constrictors           |
| Superior and middle pharyngeal constrictors            | Larynx                                                |
| Larynx                                                 | Ipsilateral parotid                                   |
| Ipsilateral parotid                                    | Cochlea                                               |
| Cochlea                                                | Contralateral submandibular gland                     |
| Posterior fossa                                        | Posterior fossa                                       |
| Ipsilateral submandibular gland                        | Ipsilateral submandibular gland                       |

*Table 6: Mandatory dose constraints for critical organs-at-risk. Constraints are applied to the PRV for IMRT plans or the worst case under uncertainty for IMPT plans.*

| <b>Organ-at-risk</b>             | <b>Dose statistic</b> | <b>Mandatory dose constraint</b> |
|----------------------------------|-----------------------|----------------------------------|
| SpinalCord under uncertainty/PRV | 1cc                   | <46 Gy(RBE)                      |
|                                  | 0.1cc                 | <48 Gy(RBE)                      |
| BrainStem under uncertainty/PRV  | 1cc                   | <54 Gy(RBE)                      |
|                                  | 0.1cc                 | <55 Gy(RBE)                      |

Table 7: Optimal dose constraints for other organs-at-risk. Constraints are applied to the volume in the nominal scenario and not under uncertainty or to a PRV.

| Organ-at-risk    | Dose statistic | Optimal dose constraint                          |
|------------------|----------------|--------------------------------------------------|
| Parotid_R        | Mean           | Contralateral: <20 Gy(RBE)<br>Ipsilateral: ALARA |
| Parotid_L        | Mean           |                                                  |
| GlnD_Submand_R   | Mean           | Contralateral: <35 Gy(RBE)<br>Ipsilateral: N/A   |
| GlnD_Submand_L   | Mean           |                                                  |
| Cavity_Oral      | Mean           | <30 Gy(RBE)                                      |
| Glottis          | Mean           | <45 Gy(RBE)                                      |
| Larynx_SG        | Mean           | <45 Gy(RBE)                                      |
| Musc_Constrict_S | Mean           | <50 Gy(RBE)                                      |
| Musc_Constrict_M | Mean           | <50 Gy(RBE)                                      |
| Musc_Constrict_I | Mean           | <20 Gy(RBE)                                      |
| Inlet_Cricophar  | Mean           | <20 Gy(RBE)                                      |
| Oesophagus_S     | Mean           | <20 Gy(RBE)                                      |
| Bone_Mandible    | 0.1cc          | <73.5 Gy(RBE)                                    |
| Cochlea_R        | Mean           | <30 Gy(RBE)                                      |
| Cochlea_L        | Mean           | <30 Gy(RBE)                                      |
| Fossa_Posterior  | Mean           | As low as possible                               |
| BrachialPlex_R*  | 0.1cc          | 60 Gy(RBE)                                       |
| BrachialPlex_L*  | 0.1cc          | 60 Gy(RBE)                                       |

\*IMPT plans only – on side(s) of neck with involved nodes

Table 8: Target volume objectives. For IMRT the target volume is the PTV and for IMPT the CTV is assessed under setup and range uncertainty.

| Volume (%) | Dose (%)          |                    |
|------------|-------------------|--------------------|
|            | Radical CTV*/PTV† | Elective CTV*/PTV† |
| 99         | ≥90               | ≥90                |
| 95         | ≥95               | ≥95                |
| 50         | 100               | -                  |
| 5          | ≤105              | As low as possible |
| 2          | ≤107              | As low as possible |

\* IMPT plans evaluated under setup and range uncertainty, † IMRT plans

## 8. VERIFICATION AND REPLANNING

Volume delineation, planning and treatment will take place locally (IMRT) or at The Christie or UCLH (IMPT).

Local practice should be followed. For IMPT this will be daily CBCT. For IMRT, it is recommended that cone beam CT (CBCT) images should be acquired for the initial three fractions and assessed off-line, with weekly images taken thereafter. If a weekly image has an out of tolerance error, verification images should be repeated for the next 2 treatments to allow for calculation of a new systematic shift. Any systematic correction applied should be confirmed using imaging after being first applied.

Patients will have a repeat planning CT scan during week 3 (IMPT and IMRT), ideally on the Wednesday (#13). Please contact the RTTQA group if the mid-treatment CT needs to be delayed for any reason or if the patient has required re-scanning prior to week 3.

The mid-treatment scan will be co-registered with the initial planning CT scan and volume delineation contours transferred from initial planning CT scan to the verification CT scan for review by the local Clinical Oncologist.

Following review and where necessary, only OAR and elective nodal contours will be amended. The therapeutic target volume contours (i.e. the geometric expansions of 5+5mm or 10mm around the primary or nodal disease) are not amended/adapted to a change in GTV. Doses to targets, electively treated volumes and OARs will be re-calculated based on the original plan and coverage of target volumes reassessed. This is done assuming that the entire treatment will be delivered as per the verification scan

A replan is required if:

- The target coverage doesn't meet the D99% and D95% protocol criteria and on visual review target coverage is deemed not to be clinically acceptable.
- The cumulative maximum dose to critical structures is >2% over tolerance or less as per local centre protocol.
- The mean dose to parotids/oral cavity/submandibular glands have increased by >3 Gy(RBE) assuming the entire treatment will be delivered as per the verification scan.

A threshold of 3 Gy(RBE) was selected as corresponding to a difference of up to 10% in NTCP for the mean dose model in the linear range (25 Gy(RBE) to 55 Gy(RBE))<sup>10</sup>. Patient-reported dryness is improved by oral cavity and submandibular gland sparing, and by extrapolation a re-planning threshold of delta 3 Gy(RBE) will be applied.

If replanning is required then the patient should begin on the new plan as soon as possible, ideally on or before the Monday of week 5. Changes in patient anatomy and setup will be monitored during treatment with re-plans permitted where required. The reasons for replanning will be collected.

If, due to observed changes in on-line imaging, a patient is rescanned earlier than week 3, and week 3 on-line imaging is consistent a further rescan may not be required.

## **9. TREATMENT INTERRUPTIONS**

Patients are treated as Category 1, defined by The Royal College of Radiologists<sup>11</sup>. Gaps in treatment should be compensated where deemed clinically appropriate to ensure treatment is delivered within the same overall treatment time (6.5 weeks). This should be by treatment with 2 fractions per day with an inter-fraction interval of at least 6 hours or patients may be treated on a weekend day (Saturday or Sunday). In this situation, patients should receive a maximum of six fractions per week.

Patients should not have a break in treatment where possible. Where interruptions are due to breakdown or unavailability of the treatment machine, patients should be transferred to a matched treatment machine in the first instance. Other causes of treatment interruption may be mitigated by treatment on weekends and bank holidays.

For proton patients, in the event of cyclotron downtime that cannot be mitigated by weekend treatment, patients will be prioritised to receive a photon backup plan according to standard departmental policy.

An IMRT contingency plan will be prospectively generated for each patient receiving IMPT so that in case of breakdown, patients will receive IMRT until service restored ensuring no treatment gaps. If used, these plans will be retrospectively reviewed for quality assurance.

## **10. RADIOTHERAPY QUALITY ASSURANCE**

### **Radiotherapy Quality Assurance Overview**

The radiotherapy quality assurance (RT QA) programme for the TORPEdO trial will be designed and implemented by the National Radiotherapy Trials QA (RTTQA) Group.

This will include pre-trial and on-trial components.

The full details of the programme will be made available on the RTTQA group website ([www.rtrialsqa.org.uk](http://www.rtrialsqa.org.uk)).

### **RT QA streamlining**

The QA processes for the TORPEdO trial will be streamlined, where possible, with previous head and neck trial QA based on both centre and Principal Investigator (PI) trial participation.

Target Volume Outlining: Principal Investigators who have successfully completed the TV outlining QA for DARS, NIMRAD, PATHOS and CompARE will be streamlined.

OAR Outlining: Principal Investigators who have successfully completed the OAR outlining QA for DARS, NIMRAD, PATHOS, CompARE and WISTERIA will be streamlined where applicable.

Planning: Centres who have successfully completed the IMRT benchmark bilateral planning case for DARS, NIMRAD, PATHOS, CompARE, WISTERIA, will be streamlined.

Please contact the RTTQA group on the TORPEdO QA email [TORPEdOqa.enh-tr@nhs.net](mailto:TORPEdOqa.enh-tr@nhs.net) for clarification.

### **Pre-Trial QA**

All Pre-Trial QA is completed prior to centre activation for the trial and may include:

Facility Questionnaire (FQ) - General and trial specific questions on equipment, software, techniques and procedures to be used for the trial.

Benchmark Outlining and Planning Cases - QA of the outlining and planning technique.

Dosimetry Audit - Centres must have successfully completed an independent external dosimetry audit through the RTTQA group or other external group.

### **On trial QA**

Prospective case review: The outlining of all cases will be prospectively reviewed. At least the first IMRT and IMPT plans from each centre will be reviewed .

Centres will be notified by email when a patient requires a prospective review.

Further prospective and/or timely retrospective reviews may be deemed necessary at the discretion of the RTTQA group and the trial CI.

To facilitate prospective case review all data should be submitted to the RTTQA Group as soon as it has been completed (case review turnaround time is a maximum of 72 hours). Please send the outlining as soon as it has been completed, together with the case history and associated imaging, to allow review before planning commences. Please allow sufficient time between plan submission and treatment start date for amendments to be actioned.

Retrospective case review:

- All IMRT and IMPT plans will be retrospectively reviewed.
- All IMPT patients will have a contingency pathway. If the patient receives treatment on an IMRT plan, this will be retrospectively reviewed.
- All rescan or replan data should be submitted for timely retrospective review.
- The mid-treatment planning CT should also be submitted for retrospective review.

### **Universal data collection**

Anonymised data, in DICOM format, will be collected for all patients. This will include:

- Brief clinical history
- Diagnostic imaging reports (CT, MRI, PET-CT)
- Diagnostic and/or planning MRIs
- Planning CT
- Structure set
- RT plan
- Total dose cube
- Per Beam dose cubes (IMPT only)
- Rescans (inc. mid-treatment planning CT) and replan data
- All CBCTs

Please send all anonymised data to the RTTQA contact.

Please email the RTTQA contact on the TORPEdO QA email [TORPEdOqa.enh-tr@nhs.net](mailto:TORPEdOqa.enh-tr@nhs.net) with any queries.

## 11. OUTLINING BENCHMARK CASE

One case should be contoured per radiotherapy centre:

- This should be undertaken by the local investigator who will be responsible for radiotherapy treatment, in collaboration with the local team.
- Please contour according to the TORPEdO Radiotherapy Guideline Document,
- Please adhere to the nomenclature as per the TORPEdO Radiotherapy Guideline Document

### **Case History – oropharynx, left base of tongue SCC, p16 positive – T2 N2b M0 (TNM7), T2 N1 M0 (TNM8)**

#### Clinical history:

54 year old man, 3 month history of left neck mass.

No significant past medical history. No regular medications. Life-long never smoker, drinks 10 units of alcohol per week. Works as a builder. Performance status 0.

#### Examination findings:

No abnormality seen on examination of oral cavity.

On nasendoscopy, lesion seen at left base of tongue, does not cross midline.

Palpable left level II node, measures approximately 4.5 x 4.5cm, mobile.

#### Left tongue base biopsy:

Basaloid squamous cell carcinoma, diffusely and strongly positive for p16.

#### MRI neck:

There is a soft tissue mass involving the left tongue base that just abuts the margin of hyoglossus muscle and extends to the vallecula. The lesion measures approximately 18mm (AP) x 22mm (RL) x 24mm (CC).

There is a large, septated, predominately cystic lesion with the left level II, which measures approximately 42mm (CC height). There is a smaller partly necrotic node just inferiorly within left level III. There are no features to suggest macroscopic extracapsular spread.

#### CT thorax:

No evidence of lung metastases.

- Primary tumour and nodal GTVs are already completed
- Clinical target volumes and OARs to be contoured

## 12. PLANNING BENCHMARK CASE

The outlining benchmark case (above) with gold standard reference contours will be used as the planning benchmark case.

Please plan in accordance with the TORPEdO Radiotherapy Guideline Document.

- Please import the CT and structure sets for the **TORPEdO Planning Case** into your own TPS system.
- Plan this case as you expect to do for patients on the trial (e.g. the same treatment planning system, beam model, standard beam/arc arrangements, etc.).
- This case is pre-contoured with:
  - Target volumes - GTV, CTV1, CTV2, PTV1, PTV2, PlanPTV1, PlanPTV2, PlanCTV1, PlanCTV2
  - OARs – SpinalCord, Brainstem, Parotid\_R, Parotid\_L, GInd\_Submand\_R, GInd\_Submand\_L, Cavity\_Oral, Glottis, Larynx\_SG, Musc\_Constrict\_I, Musc\_Constrict\_S, Inlet\_Cricophar, Oesophagus\_S, Fossa\_Posterior, Bone\_Mandible, Cochlea\_R, Cochlea\_L, BrachialPlex\_R, BrachialPlex\_L
- Please do not alter any of these contours (except as detailed below). Create additional contours as needed to aid planning.
- If you need to modify the Body outline for dose calculation or optimisation, please copy and rename the structure (keeping the original) and inform the QA team when submitting your plans.
- Grow the PTVs and PRVs using your locally-determined margins (if these don't match what was included in the benchmark case). The margins should be based on an assessment of the immobilisation and setup used locally.
- Where proton planning a photon back up plan should be produced



### 13. REFERENCES

1. [www.aboutcancer.com](http://www.aboutcancer.com), Fauces – medial sagittal view, aboutcancer.com
2. [www.aboutcancer.com](http://www.aboutcancer.com), anatomy of the pharynx (posterior view), aboutcancer.com
3. Gregoire V, Ang K, Budach W, Grau C, Hamoir M, Langendijk JA, Lee A, Le QT, Maingon P, Nutting C, O'Sullivan B, Porceddu SV, and Lengele B. *Delineation of the neck node levels for head and neck tumors: A 2013 update. DAHANCA, EORTC, HKNPCSG, NCIC CTG, NCRI, RTOG, TROG consensus guidelines*. *Radiother Oncol*, 2014. 110(1): p. 172-181.
4. Gregoire V, Evans M, Le QT, Bourhis J, Budach V, Chen A, Eisbruch A, Feng M, Giralt J, Gupta T, Hamoir M, Helito JK, Hu C, Hunter K, Johansen J, Kaanders J, Laskar SG, Lee A, Maingon P, Makitie A, Micciche F, Nicolai P, O'Sullivan B, Poitevin A, Porceddu S, Skladowski K, Tribius S, Waldron J, Wee J, Yao M, Yom SS, Zimmermann F, and Grau C. *Delineation of the primary tumour Clinical Target Volumes (CTV-P) in laryngeal, hypopharyngeal, oropharyngeal and oral cavity squamous cell carcinoma: AIRO, CACA, DAHANCA, EORTC, GEORCC, GORTEC, HKNPCSG, HNCIG, IAG-KHT, LPRHHT, NCIC CTG, NCRI, NRG Oncology, PHNS, SBRT, SOMERA, SRO, SSHNO, TROG consensus guidelines*. *Radiother Oncol*, 2018. 126(1): p. 3-24
5. Eisbruch A, Marsh LH, Dawson LA et al. *Recurrences near base of skull after IMRT for head-and-neck cancer: implications for target delineation in high neck and for parotid gland sparing*. *Int. J. Radiation Oncology Biol Phys* 2004. 59(1): p. 28-42.
6. Brouwer CL, Steenbakkers RJ, Bourhis J, Budach W, Grau C, Gregoire V, van Herk M, Lee A, Maingon P, Nutting C, O'Sullivan B, Porceddu SV, Rosenthal DI, Sijtsema NM, and Langendijk JA. *CT-based delineation of organs at risk in the head and neck region: DAHANCA, EORTC, GORTEC, HKNPCSG, NCIC CTG, NCRI, NRG Oncology and TROG consensus guidelines*. *Radiother Oncol*, 2015. 117(1): p. 83-90
7. Christianen MEMC, Langendijk JA, Westerlaan HE, van de Water TA, Bijl HP. *Delineation of organs at risk involved in swallowing for radiotherapy treatment planning*. *Radiother Oncol*, 2011. 101(3): p. 394-402.
8. Hall WH, Guiou M, Lee NY, Dublin A, Narayan S, Vijayakumar S, Purdy JA, Chen AM. *Development and validation of a standardized method for contouring the brachial plexus: preliminary dosimetric analysis among patients treated with IMRT for head-and-neck cancer*. *Int. J. Radiation Oncology Biol Phys* 2008. 72(5): p. 1362-1367.
9. Isotoxic IMRTstudy TMG. OAR Atlas for the ADSCaN Study: All trial arms. p. 1-13.
10. Brouwer CL, Steenbakkers RJ, van der Schaaf A, Sopacua CT, van Dijk LV, Kierkels RG, Bijl HP, Burgerhof JG, Langendijk JA, and Sijtsema NM. *Selection of head and neck cancer patients for adaptive radiotherapy to decrease xerostomia*. *Radiother Oncol*, 2016. 120(1): p. 36-40.
11. The Royal College of Radiologists: *The timely delivery of radical radiotherapy: guidelines for the management of unscheduled treatment interruptions* 2019. Fourth Edition.
12. Mir R, Kelly SM, Xiao Y, et al. Organ at risk delineation for radiation therapy clinical trials: Global Harmonization Group consensus guidelines. *Radiother Oncol*. 2020 Sep;150:30-39. doi: 10.1016/j.radonc.2020.05.038. Epub 2020 Jun 3. PMID: 32504762.
